# Supplementary material for: Evaluation of genetic susceptibility of common variants in CACNA1D with schizophrenia in Han Chinese
Source: PubMed Central journal article supplement (PMC4530443; doi:10.1038/srep12935), 2015-08-10
Supplement: srep12935-s1.pdf [file srep12935-s1.pdf]

**Title:** Evaluation of genetic susceptibility of common variants in *CACNA1D* with schizophrenia in Han Chinese

**Author names and affiliations:** Fanglin Guan <sup>a,e</sup>, Lu Li <sup>b</sup>, Chuchu Qiao <sup>b</sup>, Gang Chen <sup>b</sup>, Tinglin Yan <sup>b,c</sup>, Tao Li <sup>b,c</sup>, Tianxiao Zhang <sup>d</sup> and Xinshe Liu <sup>b,c</sup>

<sup>a</sup> Key Laboratory of Environment and Genes Related to Diseases, Ministry of Education, Xi'an, China;

<sup>b</sup> Key Laboratory of National Ministry of Health for Forensic Sciences, School of Medicine & Forensics, Xi'an Jiaotong University, Xi'an, China

<sup>c</sup> Department of Forensic Psychiatry, School of Medicine & Forensics, Xi'an Jiaotong University, Xi'an, China;

<sup>d</sup> Department of Psychiatry, Washington University in Saint Louis, MO, USA;

<sup>e</sup> Institute of Human Genomics & Forensic Sciences, Xi'an, China.

**Corresponding author:** Xinshe Liu, Ph.D., M.D., Key Laboratory of National Ministry of Health for Forensic Sciences, School of Medicine, Xi'an Jiaotong University, Xi'an, China, 710061. Tel.: +86-29-82655475; Fax: +86-29-82655473, E-mail: [lxins@mail.xjtu.edu.cn](mailto:lxins@mail.xjtu.edu.cn)

TableS1 Allele and genotype frequency of single SNP association analysis in the testing dataset

| Makers      |            | Allele Freq. (%) |             | p-value <sup>1</sup> | Genotype Freq. (%) |            |            | p-value <sup>1</sup> | H-WE p value |
|-------------|------------|------------------|-------------|----------------------|--------------------|------------|------------|----------------------|--------------|
| SNP ID / bp |            |                  |             |                      |                    |            |            |                      |              |
|             | rs312480   | C                | T           |                      | CC                 | CT         | TT         |                      |              |
| SCZ         | 53,495,113 | 1990(89.08)      | 244(10.92)  | 0.171346             | 889(79.59)         | 212(18.98) | 16(1.43)   | 0.39283              | 0.411        |
| CTR         |            | 3274(90.19)      | 356(9.81)   |                      | 1479(81.49)        | 316(17.41) | 20(1.1)    |                      | 0.5          |
|             | rs219847   | A                | G           |                      | AA                 | AG         | GG         |                      |              |
| SCZ         | 53,499,800 | 1206(53.98)      | 1028(46.02) | 0.361012             | 327(29.27)         | 552(49.42) | 238(21.31) | 0.629978             | 0.859        |
| CTR         |            | 2004(55.21)      | 1626(44.79) |                      | 561(30.91)         | 882(48.6)  | 372(20.5)  |                      | 0.457        |
|             | rs6763768  | T                | C           |                      | TT                 | TC         | CC         |                      |              |
| SCZ         | 53,503,852 | 1471(65.85)      | 763(34.15)  | 0.164871             | 327(29.27)         | 552(49.42) | 238(21.31) | 0.629978             | 0.859        |
| CTR         |            | 2454(67.6)       | 1176(32.4)  |                      | 561(30.91)         | 882(48.6)  | 372(20.5)  |                      | 0.555        |
|             | rs3774419  | G                | A           |                      | GG                 | GA         | AA         |                      |              |
| SCZ         | 53,511,535 | 1699(76.05)      | 535(23.95)  | 0.464696             | 643(57.56)         | 413(36.97) | 61(5.46)   | 0.75743              | 0.615        |
| CTR         |            | 2730(75.21)      | 900(24.79)  |                      | 1020(56.2)         | 690(38.02) | 105(5.79)  |                      | 0.408        |
|             | rs312487   | C                | T           |                      | CC                 | CT         | TT         |                      |              |
| SCZ         | 53,511,595 | 1145(51.25)      | 1089(48.75) | 0.394802             | 290(25.96)         | 565(50.58) | 262(23.46) | 0.674224             | 0.682        |
| CTR         |            | 1902(52.4)       | 1728(47.6)  |                      | 497(27.38)         | 908(50.03) | 410(22.59) |                      | 0.903        |
|             | rs17053118 | C                | T           |                      | CC                 | CT         | TT         |                      |              |
| SCZ         | 53,514,902 | 1829(81.87)      | 405(18.13)  | 0.193                | 748(66.97)         | 333(29.81) | 36(3.22)   | 0.426531             | 0.886        |
| CTR         |            | 3020(83.2)       | 610(16.8)   |                      | 1256(69.2)         | 508(27.99) | 51(2.81)   |                      | 0.966        |
|             | rs312481   | G                | A           |                      | GG                 | GA         | AA         |                      |              |
| SCZ         | 53,517,875 | 1795(80.35)      | 439(19.65)  | 0.479508             | 719(64.37)         | 357(31.96) | 41(3.67)   | 0.77304              | 0.686        |
| CTR         |            | 2889(79.59)      | 741(20.41)  |                      | 1145(63.09)        | 599(33)    | 71(3.91)   |                      | 0.503        |
|             | rs979220   | T                | C           |                      | TT                 | TC         | CC         |                      |              |
| SCZ         | 53,522,196 | 2033(91)         | 201(9)      | 0.188377             | 926(82.9)          | 181(16.2)  | 10(0.9)    | 0.424737             | 0.726        |
| CTR         |            | 3339(91.98)      | 291(8.02)   |                      | 1537(84.68)        | 265(14.6)  | 13(0.72)   |                      | 0.671        |
|             | rs3774424  | G                | T           |                      | GG                 | GT         | TT         |                      |              |
| SCZ         | 53,522,631 | 1890(84.6)       | 344(15.4)   | 0.690047             | 800(71.62)         | 290(25.96) | 27(2.42)   | 0.923396             | 0.906        |
| CTR         |            | 3085(84.99)      | 545(15.01)  |                      | 1312(72.29)        | 461(25.4)  | 42(2.31)   |                      | 0.841        |
|             | rs9311502  | T                | C           |                      | TT                 | TC         | CC         |                      |              |
| SCZ         | 53,526,294 | 1458(65.26)      | 776(34.74)  | 0.331342             | 471(42.17)         | 516(46.2)  | 130(11.64) | 0.614988             | 0.529        |
| CTR         |            | 2414(66.5)       | 1216(33.5)  |                      | 797(43.91)         | 820(45.18) | 198(10.91) |                      | 0.55         |
|             | rs17053141 | G                | A           |                      | GG                 | GA         | AA         |                      |              |
| SCZ         | 53,526,895 | 2088(93.46)      | 146(6.54)   | 0.150744             | 977(87.47)         | 134(12)    | 6(0.54)    | 0.227899             | 0.547        |
| CTR         |            | 3426(94.38)      | 204(5.62)   |                      | 1617(89.09)        | 192(10.58) | 6(0.33)    |                      | 0.906        |
|             | rs3774429  | G                | A           |                      | GG                 | GA         | AA         |                      |              |
| SCZ         | 53,532,379 | 1941(86.88)      | 293(13.12)  | 0.170041             | 840(75.2)          | 261(23.37) | 16(1.43)   | 0.205917             | 0.399        |
| CTR         |            | 3198(88.1)       | 432(11.9)   |                      | 1412(77.8)         | 374(20.61) | 29(1.6)    |                      | 0.461        |
|             | rs3774437  | C                | T           |                      | CC                 | CT         | TT         |                      |              |
| SCZ         | 53,534,890 | 1942(86.93)      | 292(13.07)  | 0.316956             | 846(75.74)         | 250(22.38) | 21(1.88)   | 0.572593             | 0.614        |

|     |            |             |             |          |             |            |            |          |       |
|-----|------------|-------------|-------------|----------|-------------|------------|------------|----------|-------|
| CTR |            | 3122(86.01) | 508(13.99)  |          | 1343(73.99) | 436(24.02) | 36(1.98)   |          | 0.929 |
|     | rs13078747 | T           | C           |          | TT          | TC         | CC         |          |       |
| SCZ | 53,539,490 | 1711(76.59) | 523(23.41)  | 0.212894 | 650(58.19)  | 411(36.79) | 56(5.01)   | 0.246743 | 0.384 |
| CTR |            | 2831(77.99) | 799(22.01)  |          | 1109(61.1)  | 613(33.77) | 93(5.12)   |          | 0.488 |
|     | rs3774439  | T           | A           |          | TT          | TA         | AA         |          |       |
| SCZ | 53,547,698 | 1758(78.69) | 476(21.31)  | 0.315946 | 690(61.77)  | 378(33.84) | 49(4.39)   | 0.525164 | 0.76  |
| CTR |            | 2816(77.58) | 814(22.42)  |          | 1096(60.39) | 624(34.38) | 95(5.23)   |          | 0.614 |
|     | rs6764908  | T           | C           |          | TT          | TC         | CC         |          |       |
| SCZ | 53,549,441 | 1824(81.65) | 410(18.35)  | 0.175897 | 748(66.97)  | 328(29.36) | 41(3.67)   | 0.34544  | 0.5   |
| CTR |            | 3014(83.03) | 616(16.97)  |          | 1251(68.93) | 512(28.21) | 52(2.87)   |          | 0.965 |
|     | rs2109182  | C           | T           |          | CC          | CT         | TT         |          |       |
| SCZ | 53,549,697 | 1902(85.14) | 332(14.86)  | 0.171072 | 808(72.34)  | 286(25.6)  | 23(2.06)   | 0.364963 | 0.693 |
| CTR |            | 3137(86.42) | 493(13.58)  |          | 1356(74.71) | 425(23.42) | 34(1.87)   |          | 0.917 |
|     | rs2359453  | G           | A           |          | GG          | GA         | AA         |          |       |
| SCZ | 53,558,837 | 1177(52.69) | 1057(47.31) | 0.254219 | 308(27.57)  | 561(50.22) | 248(22.2)  | 0.517762 | 0.805 |
| CTR |            | 1968(54.21) | 1662(45.79) |          | 532(29.31)  | 904(49.81) | 379(20.88) |          | 0.889 |
|     | rs11715993 | T           | C           |          | TT          | TC         | CC         |          |       |
| SCZ | 53,565,945 | 1700(76.1)  | 534(23.9)   | 0.594052 | 649(58.1)   | 402(35.99) | 66(5.91)   | 0.860411 | 0.72  |
| CTR |            | 2740(75.48) | 890(24.52)  |          | 1036(57.08) | 668(36.8)  | 111(6.12)  |          | 0.81  |
|     | rs17053186 | C           | T           |          | CC          | CT         | TT         |          |       |
| SCZ | 53,566,110 | 1918(85.85) | 316(14.15)  | 0.50414  | 825(73.86)  | 268(23.99) | 24(2.15)   | 0.798605 | 0.684 |
| CTR |            | 3139(86.47) | 491(13.53)  |          | 1359(74.88) | 421(23.2)  | 35(1.93)   |          | 0.719 |
|     | rs709318   | C           | T           |          | CC          | CT         | TT         |          |       |
| SCZ | 53,575,794 | 2034(91.05) | 200(8.95)   | 0.343173 | 929(83.17)  | 176(15.76) | 12(1.07)   | 0.595115 | 0.263 |
| CTR |            | 3278(90.3)  | 352(9.7)    |          | 1483(81.71) | 312(17.19) | 20(1.1)    |          | 0.432 |
|     | rs807193   | A           | G           |          | AA          | AG         | GG         |          |       |
| SCZ | 53,582,311 | 1430(64.01) | 804(35.99)  | 0.340935 | 457(40.91)  | 516(46.2)  | 144(12.89) | 0.63164  | 0.93  |
| CTR |            | 2368(65.23) | 1262(34.77) |          | 770(42.42)  | 828(45.62) | 217(11.96) |          | 0.806 |
|     | rs17053233 | T           | C           |          | TT          | TC         | CC         |          |       |
| SCZ | 53,590,523 | 1764(78.96) | 470(21.04)  | 0.337886 | 699(62.58)  | 366(32.77) | 52(4.66)   | 0.554554 | 0.645 |
| CTR |            | 2904(80)    | 726(20)     |          | 1160(63.91) | 584(32.18) | 71(3.91)   |          | 0.814 |
|     | rs6445588  | C           | T           |          | CC          | CT         | TT         |          |       |
| SCZ | 53,596,652 | 1587(71.04) | 647(28.96)  | 0.251673 | 559(50.04)  | 469(41.99) | 89(7.97)   | 0.510536 | 0.495 |
| CTR |            | 2629(72.42) | 1001(27.58) |          | 946(52.12)  | 737(40.61) | 132(7.27)  |          | 0.479 |
|     | rs9866078  | G           | A           |          | GG          | GA         | AA         |          |       |
| SCZ | 53,601,415 | 1262(56.49) | 972(43.51)  | 0.778689 | 354(31.69)  | 554(49.6)  | 209(18.71) | 0.894498 | 0.765 |
| CTR |            | 2037(56.12) | 1593(43.88) |          | 574(31.63)  | 889(48.98) | 352(19.39) |          | 0.814 |
|     | rs3774473  | G           | A           |          | GG          | GA         | AA         |          |       |
| SCZ | 53,604,824 | 1804(80.75) | 430(19.25)  | 0.681676 | 731(65.44)  | 342(30.62) | 44(3.94)   | 0.662441 | 0.614 |
| CTR |            | 2947(81.18) | 683(18.82)  |          | 1192(65.67) | 563(31.02) | 60(3.31)   |          | 0.513 |
|     | rs13063116 | A           | G           |          | AA          | AG         | GG         |          |       |
| SCZ | 53,615,650 | 1841(82.41) | 393(17.59)  | 0.504351 | 762(68.22)  | 317(28.38) | 38(3.4)    | 0.649218 | 0.479 |

|     |            |             |             |          |             |            |            |          |       |
|-----|------------|-------------|-------------|----------|-------------|------------|------------|----------|-------|
| CTR |            | 3016(83.09) | 614(16.91)  |          | 1252(68.98) | 512(28.21) | 51(2.81)   |          | 0.877 |
|     | rs898413   | A           | G           |          | AA          | AG         | GG         |          |       |
| SCZ | 53,617,389 | 1931(86.44) | 303(13.56)  | 0.382238 | 838(75.02)  | 255(22.83) | 24(2.15)   | 0.373273 | 0.378 |
| CTR |            | 3108(85.62) | 522(14.38)  |          | 1327(73.11) | 454(25.01) | 34(1.87)   |          | 0.501 |
|     | rs3796345  | C           | T           |          | CC          | CT         | TT         |          |       |
| SCZ | 53,619,125 | 1561(69.87) | 673(30.13)  | 0.284616 | 547(48.97)  | 467(41.81) | 103(9.22)  | 0.537793 | 0.817 |
| CTR |            | 2584(71.18) | 1046(28.82) |          | 918(50.58)  | 748(41.21) | 149(8.21)  |          | 0.845 |
|     | rs3774480  | C           | T           |          | CC          | CT         | TT         |          |       |
| SCZ | 53,620,866 | 1633(73.1)  | 601(26.9)   | 0.809772 | 591(52.91)  | 451(40.38) | 75(6.71)   | 0.955272 | 0.374 |
| CTR |            | 2643(72.81) | 987(27.19)  |          | 955(52.62)  | 733(40.39) | 127(7)     |          | 0.394 |
|     | rs12493744 | T           | C           |          | TT          | TC         | CC         |          |       |
| SCZ | 53,626,003 | 1207(54.03) | 1027(45.97) | 0.305686 | 322(28.83)  | 563(50.4)  | 232(20.77) | 0.549464 | 0.625 |
| CTR |            | 2011(55.4)  | 1619(44.6)  |          | 557(30.69)  | 897(49.42) | 361(19.89) |          | 0.997 |
|     | rs3774491  | C           | G           |          | CC          | CG         | GG         |          |       |
| SCZ | 53,629,808 | 1628(72.87) | 606(27.13)  | 0.290209 | 596(53.36)  | 436(39.03) | 85(7.61)   | 0.54837  | 0.671 |
| CTR |            | 2599(71.6)  | 1031(28.4)  |          | 931(51.29)  | 737(40.61) | 147(8.1)   |          | 0.946 |
|     | rs6802110  | G           | A           |          | GG          | GA         | AA         |          |       |
| SCZ | 53,633,205 | 1972(88.27) | 262(11.73)  | 0.133659 | 871(77.98)  | 230(20.59) | 16(1.43)   | 0.326868 | 0.854 |
| CTR |            | 3250(89.53) | 380(10.47)  |          | 1456(80.22) | 338(18.62) | 21(1.16)   |          | 0.781 |
|     | rs1380606  | C           | T           |          | CC          | CT         | TT         |          |       |
| SCZ | 53,634,105 | 1820(81.47) | 414(18.53)  | 0.47597  | 737(65.98)  | 346(30.98) | 34(3.04)   | 0.69388  | 0.387 |
| CTR |            | 2930(80.72) | 700(19.28)  |          | 1180(65.01) | 570(31.4)  | 65(3.58)   |          | 0.707 |
|     | rs6786135  | T           | C           |          | TT          | TC         | CC         |          |       |
| SCZ | 53,635,938 | 1609(72.02) | 625(27.98)  | 0.303705 | 581(52.01)  | 447(40.02) | 89(7.97)   | 0.579152 | 0.815 |
| CTR |            | 2569(70.77) | 1061(29.23) |          | 909(50.08)  | 751(41.38) | 155(8.54)  |          | 0.995 |
|     | rs2077167  | C           | T           |          | CC          | CT         | TT         |          |       |
| SCZ | 53,637,392 | 1273(56.98) | 961(43.02)  | 0.389335 | 355(31.78)  | 563(50.4)  | 199(17.82) | 0.3362   | 0.347 |
| CTR |            | 2110(58.13) | 1520(41.87) |          | 621(34.21)  | 868(47.82) | 326(17.96) |          | 0.454 |
|     | rs6803827  | G           | A           |          | GG          | GA         | AA         |          |       |
| SCZ | 53,642,306 | 1503(67.28) | 731(32.72)  | 0.59832  | 508(45.48)  | 487(43.6)  | 122(10.92) | 0.868129 | 0.744 |
| CTR |            | 2418(66.61) | 1212(33.39) |          | 808(44.52)  | 802(44.19) | 205(11.29) |          | 0.778 |
|     | rs2276836  | C           | T           |          | CC          | CT         | TT         |          |       |
| SCZ | 53,651,012 | 1161(51.97) | 1073(48.03) | 0.350473 | 298(26.68)  | 565(50.58) | 254(22.74) | 0.609964 | 0.659 |
| CTR |            | 1932(53.22) | 1698(46.78) |          | 514(28.32)  | 904(49.81) | 397(21.87) |          | 0.99  |
|     | rs3774519  | T           | G           |          | TT          | TG         | GG         |          |       |
| SCZ | 53,661,215 | 1955(87.51) | 279(12.49)  | 0.354773 | 857(76.72)  | 241(21.58) | 19(1.7)    | 0.624568 | 0.666 |
| CTR |            | 3206(88.32) | 424(11.68)  |          | 1416(78.02) | 374(20.61) | 25(1.38)   |          | 0.957 |
|     | rs3774523  | T           | C           |          | TT          | TC         | CC         |          |       |
| SCZ | 53,666,733 | 1798(80.48) | 436(19.52)  | 0.707417 | 727(65.09)  | 344(30.8)  | 46(4.12)   | 0.710416 | 0.511 |
| CTR |            | 2936(80.88) | 694(19.12)  |          | 1185(65.29) | 566(31.18) | 64(3.53)   |          | 0.722 |
|     | rs2633707  | C           | G           |          | CC          | CG         | GG         |          |       |
| SCZ | 53,675,055 | 1719(76.95) | 515(23.05)  | 0.287939 | 665(59.53)  | 389(34.83) | 63(5.64)   | 0.554793 | 0.539 |

|     |            |             |             |          |             |            |            |          |       |
|-----|------------|-------------|-------------|----------|-------------|------------|------------|----------|-------|
| CTR |            | 2749(75.73) | 881(24.27)  |          | 1044(57.52) | 661(36.42) | 110(6.06)  |          | 0.693 |
|     | rs12492502 | A           | G           |          | AA          | AG         | GG         |          |       |
| SCZ | 53,681,047 | 1250(55.95) | 984(44.05)  | 0.91604  | 347(31.07)  | 556(49.78) | 214(19.16) | 0.864254 | 0.742 |
| CTR |            | 2026(55.81) | 1604(44.19) |          | 570(31.4)   | 886(48.82) | 359(19.78) |          | 0.66  |
|     | rs898411   | T           | C           |          | TT          | TC         | CC         |          |       |
| SCZ | 53,682,885 | 1580(70.73) | 654(29.27)  | 0.269071 | 562(50.31)  | 456(40.82) | 99(8.86)   | 0.546428 | 0.636 |
| CTR |            | 2616(72.07) | 1014(27.93) |          | 947(52.18)  | 722(39.78) | 146(8.04)  |          | 0.61  |
|     | rs11130377 | T           | C           |          | TT          | TC         | CC         |          |       |
| SCZ | 53,688,847 | 1347(60.3)  | 887(39.7)   | 0.822481 | 403(36.08)  | 541(48.43) | 173(15.49) | 0.970151 | 0.699 |
| CTR |            | 2178(60)    | 1452(40)    |          | 650(35.81)  | 878(48.37) | 287(15.81) |          | 0.739 |
|     | rs1380608  | A           | G           |          | AA          | AG         | GG         |          |       |
| SCZ | 53,690,343 | 1925(86.17) | 309(13.83)  | 0.212745 | 834(74.66)  | 257(23.01) | 26(2.33)   | 0.279825 | 0.245 |
| CTR |            | 3085(84.99) | 545(15.01)  |          | 1310(72.18) | 465(25.62) | 40(2.2)    |          | 0.867 |
|     | rs9841978  | G           | A           |          | GG          | GA         | AA         |          |       |
| SCZ | 53,696,708 | 1582(70.81) | 652(29.19)  | 0.796408 | 554(49.6)   | 474(42.44) | 89(7.97)   | 0.802103 | 0.374 |
| CTR |            | 2582(71.13) | 1048(28.87) |          | 917(50.52)  | 748(41.21) | 150(8.26)  |          | 0.884 |
|     | rs7340705  | T           | C           |          | TT          | TC         | CC         |          |       |
| SCZ | 53,700,416 | 1215(54.39) | 1019(45.61) | 0.325205 | 324(29.01)  | 567(50.76) | 226(20.23) | 0.574107 | 0.44  |
| CTR |            | 2022(55.7)  | 1608(44.3)  |          | 559(30.8)   | 904(49.81) | 352(19.39) |          | 0.693 |
|     | rs6445597  | G           | A           |          | GG          | GA         | AA         |          |       |
| SCZ | 53,700,504 | 1386(62.04) | 848(37.96)  | 0.847872 | 435(38.94)  | 516(46.2)  | 166(14.86) | 0.912998 | 0.521 |
| CTR |            | 2243(61.79) | 1387(38.21) |          | 695(38.29)  | 853(47)    | 267(14.71) |          | 0.841 |
|     | rs9830632  | A           | G           |          | AA          | AG         | GG         |          |       |
| SCZ | 53,701,739 | 1877(84.02) | 357(15.98)  | 0.305352 | 792(70.9)   | 293(26.23) | 32(2.86)   | 0.594443 | 0.439 |
| CTR |            | 3086(85.01) | 544(14.99)  |          | 1316(72.51) | 454(25.01) | 45(2.48)   |          | 0.435 |
|     | rs3774529  | G           | T           |          | GG          | GT         | TT         |          |       |
| SCZ | 53,703,134 | 1898(84.96) | 336(15.04)  | 0.380538 | 805(72.07)  | 288(25.78) | 24(2.15)   | 0.640292 | 0.767 |
| CTR |            | 3053(84.1)  | 577(15.9)   |          | 1285(70.8)  | 483(26.61) | 47(2.59)   |          | 0.841 |
|     | rs3774533  | A           | G           |          | AA          | AG         | GG         |          |       |
| SCZ | 53,704,293 | 1427(63.88) | 807(36.12)  | 0.388287 | 451(40.38)  | 525(47)    | 141(12.62) | 0.683596 | 0.537 |
| CTR |            | 2359(64.99) | 1271(35.01) |          | 760(41.87)  | 839(46.23) | 216(11.9)  |          | 0.502 |
|     | rs2633731  | C           | T           |          | CC          | CT         | TT         |          |       |
| SCZ | 53,704,397 | 1798(80.48) | 436(19.52)  | 0.277249 | 726(65)     | 346(30.98) | 45(4.03)   | 0.51404  | 0.64  |
| CTR |            | 2963(81.63) | 667(18.37)  |          | 1209(66.61) | 545(30.03) | 61(3.36)   |          | 0.965 |
|     | rs3821857  | T           | C           |          | TT          | TC         | CC         |          |       |
| SCZ | 53,704,433 | 1823(81.6)  | 411(18.4)   | 0.394574 | 746(66.79)  | 331(29.63) | 40(3.58)   | 0.638917 | 0.662 |
| CTR |            | 2994(82.48) | 636(17.52)  |          | 1234(67.99) | 526(28.98) | 55(3.03)   |          | 0.907 |
|     | rs2633730  | C           | T           |          | CC          | CT         | TT         |          |       |
| SCZ | 53,706,672 | 1183(52.95) | 1051(47.05) | 0.30662  | 308(27.57)  | 567(50.76) | 242(21.67) | 0.567338 | 0.53  |
| CTR |            | 1972(54.33) | 1658(45.67) |          | 532(29.31)  | 908(50.03) | 375(20.66) |          | 0.73  |
|     | rs2633728  | C           | G           |          | CC          | CG         | GG         |          |       |
| SCZ | 53,706,912 | 1854(82.99) | 380(17.01)  | 0.325993 | 774(69.29)  | 306(27.39) | 37(3.31)   | 0.596633 | 0.321 |

|     |            |             |             |          |             |            |            |          |       |
|-----|------------|-------------|-------------|----------|-------------|------------|------------|----------|-------|
| CTR |            | 2976(81.98) | 654(18.02)  |          | 1225(67.49) | 526(28.98) | 64(3.53)   |          | 0.419 |
|     | rs3774541  | G           | A           |          | GG          | GA         | AA         |          |       |
| SCZ | 53,707,105 | 1608(71.98) | 626(28.02)  | 0.229332 | 574(51.39)  | 460(41.18) | 83(7.43)   | 0.474874 | 0.485 |
| CTR |            | 2665(73.42) | 965(26.58)  |          | 973(53.61)  | 719(39.61) | 123(6.78)  |          | 0.526 |
|     | rs2680661  | T           | G           |          | TT          | TG         | GG         |          |       |
| SCZ | 53,708,121 | 1227(54.92) | 1007(45.08) | 0.430219 | 333(29.81)  | 561(50.22) | 223(19.96) | 0.714309 | 0.632 |
| CTR |            | 2032(55.98) | 1598(44.02) |          | 566(31.18)  | 900(49.59) | 349(19.23) |          | 0.794 |
|     | rs2612015  | T           | G           |          | TT          | TG         | GG         |          |       |
| SCZ | 53,708,304 | 2011(90.02) | 223(9.98)   | 0.794922 | 904(80.93)  | 203(18.17) | 10(0.9)    | 0.86389  | 0.707 |
| CTR |            | 3260(89.81) | 370(10.19)  |          | 1465(80.72) | 330(18.18) | 20(1.1)    |          | 0.769 |
|     | rs6445598  | A           | T           |          | AA          | AT         | TT         |          |       |
| SCZ | 53,708,709 | 1763(78.92) | 471(21.08)  | 0.190476 | 694(62.13)  | 375(33.57) | 48(4.3)    | 0.414344 | 0.767 |
| CTR |            | 2916(80.33) | 714(19.67)  |          | 1171(64.52) | 574(31.63) | 70(3.86)   |          | 0.974 |
|     | rs3821858  | T           | C           |          | TT          | TC         | CC         |          |       |
| SCZ | 53,713,653 | 1950(87.29) | 284(12.71)  | 0.125022 | 850(76.1)   | 250(22.38) | 17(1.52)   | 0.303802 | 0.777 |
| CTR |            | 3217(88.62) | 413(11.38)  |          | 1425(78.51) | 367(20.22) | 23(1.27)   |          | 0.908 |
|     | rs2070617  | G           | A           |          | GG          | GA         | AA         |          |       |
| SCZ | 53,724,022 | 1329(59.49) | 905(40.51)  | 0.498884 | 391(35)     | 547(48.97) | 179(16.03) | 0.781694 | 0.593 |
| CTR |            | 2127(58.6)  | 1503(41.4)  |          | 619(34.1)   | 889(48.98) | 307(16.91) |          | 0.687 |
|     | rs7638857  | C           | A           |          | CC          | CA         | AA         |          |       |
| SCZ | 53,724,296 | 1592(71.26) | 642(28.74)  | 0.233121 | 565(50.58)  | 462(41.36) | 90(8.06)   | 0.467973 | 0.743 |
| CTR |            | 2639(72.7)  | 991(27.3)   |          | 960(52.89)  | 719(39.61) | 136(7.49)  |          | 0.931 |
|     | rs17053417 | G           | A           |          | GG          | GA         | AA         |          |       |
| SCZ | 53,725,362 | 1971(88.23) | 263(11.77)  | 0.404589 | 868(77.71)  | 235(21.04) | 14(1.25)   | 0.647895 | 0.67  |
| CTR |            | 3176(87.49) | 454(12.51)  |          | 1390(76.58) | 396(21.82) | 29(1.6)    |          | 0.896 |
|     | rs1020819  | C           | A           |          | CC          | CA         | AA         |          |       |
| SCZ | 53,728,686 | 1595(71.4)  | 639(28.6)   | 0.283622 | 574(51.39)  | 447(40.02) | 96(8.59)   | 0.440466 | 0.499 |
| CTR |            | 2544(70.08) | 1086(29.92) |          | 889(48.98)  | 766(42.2)  | 160(8.82)  |          | 0.784 |
|     | rs17030975 | C           | T           |          | CC          | CT         | TT         |          |       |
| SCZ | 53,734,178 | 1394(62.4)  | 840(37.6)   | 0.539915 | 441(39.48)  | 512(45.84) | 164(14.68) | 0.665986 | 0.438 |
| CTR |            | 2294(63.2)  | 1336(36.8)  |          | 724(39.89)  | 846(46.61) | 245(13.5)  |          | 0.931 |
|     | rs1045958  | C           | T           |          | CC          | CT         | TT         |          |       |
| SCZ | 53,735,452 | 1614(72.25) | 620(27.75)  | 0.135542 | 588(52.64)  | 438(39.21) | 91(8.15)   | 0.258517 | 0.459 |
| CTR |            | 2687(74.02) | 943(25.98)  |          | 993(54.71)  | 701(38.62) | 121(6.67)  |          | 0.856 |
|     | rs11915963 | T           | C           |          | TT          | TC         | CC         |          |       |
| SCZ | 53,737,887 | 1997(89.39) | 237(10.61)  | 0.455105 | 890(79.68)  | 217(19.43) | 10(0.9)    | 0.34406  | 0.417 |
| CTR |            | 3267(90)    | 363(10)     |          | 1474(81.21) | 319(17.58) | 22(1.21)   |          | 0.315 |
|     | rs2612027  | A           | G           |          | AA          | AG         | GG         |          |       |
| SCZ | 53,742,651 | 1206(53.98) | 1028(46.02) | 0.14714  | 317(28.38)  | 572(51.21) | 228(20.41) | 0.199044 | 0.305 |
| CTR |            | 2030(55.92) | 1600(44.08) |          | 572(31.52)  | 886(48.82) | 357(19.67) |          | 0.676 |
|     | rs2680648  | T           | C           |          | TT          | TC         | CC         |          |       |
| SCZ | 53,743,149 | 1669(74.71) | 565(25.29)  | 0.440916 | 619(55.42)  | 431(38.59) | 67(6)      | 0.624231 | 0.481 |

|     |            |             |             |          |             |            |            |          |       |
|-----|------------|-------------|-------------|----------|-------------|------------|------------|----------|-------|
| CTR |            | 2679(73.8)  | 951(26.2)   |          | 989(54.49)  | 701(38.62) | 125(6.89)  |          | 0.959 |
|     | rs2253795  | G           | T           |          | GG          | GT         | TT         |          |       |
| SCZ | 53,744,848 | 1888(84.51) | 346(15.49)  | 0.115448 | 801(71.71)  | 286(25.6)  | 30(2.69)   | 0.285943 | 0.464 |
| CTR |            | 3122(86.01) | 508(13.99)  |          | 1345(74.1)  | 432(23.8)  | 38(2.09)   |          | 0.632 |
|     | rs17053459 | A           | G           |          | AA          | AG         | GG         |          |       |
| SCZ | 53,746,967 | 2037(91.18) | 197(8.82)   | 0.173832 | 929(83.17)  | 179(16.03) | 9(0.81)    | 0.396657 | 0.907 |
| CTR |            | 3271(90.11) | 359(9.89)   |          | 1474(81.21) | 323(17.8)  | 18(0.99)   |          | 0.948 |
|     | rs3774560  | T           | C           |          | TT          | TC         | CC         |          |       |
| SCZ | 53,751,376 | 2000(89.53) | 234(10.47)  | 0.174597 | 897(80.3)   | 206(18.44) | 14(1.25)   | 0.389449 | 0.578 |
| CTR |            | 3208(88.37) | 422(11.63)  |          | 1419(78.18) | 370(20.39) | 26(1.43)   |          | 0.737 |
|     | rs17053472 | A           | C           |          | AA          | AC         | CC         |          |       |
| SCZ | 53,754,705 | 2036(91.14) | 198(8.86)   | 0.287497 | 930(83.26)  | 176(15.76) | 11(0.98)   | 0.506773 | 0.41  |
| CTR |            | 3278(90.3)  | 352(9.7)    |          | 1481(81.6)  | 316(17.41) | 18(0.99)   |          | 0.802 |
|     | rs3774563  | A           | G           |          | AA          | AG         | GG         |          |       |
| SCZ | 53,756,249 | 1852(82.9)  | 382(17.1)   | 0.367205 | 773(69.2)   | 306(27.39) | 38(3.4)    | 0.594272 | 0.26  |
| CTR |            | 3042(83.8)  | 588(16.2)   |          | 1278(70.41) | 486(26.78) | 51(2.81)   |          | 0.559 |
|     | rs3796347  | G           | A           |          | GG          | GA         | AA         |          |       |
| SCZ | 53,758,863 | 1807(80.89) | 427(19.11)  | 0.152984 | 729(65.26)  | 349(31.24) | 39(3.49)   | 0.340651 | 0.726 |
| CTR |            | 2990(82.37) | 640(17.63)  |          | 1232(67.88) | 526(28.98) | 57(3.14)   |          | 0.925 |
|     | rs3774573  | T           | C           |          | TT          | TC         | CC         |          |       |
| SCZ | 53,765,933 | 1853(82.95) | 381(17.05)  | 0.348147 | 771(69.02)  | 311(27.84) | 35(3.13)   | 0.642204 | 0.595 |
| CTR |            | 2976(81.98) | 654(18.02)  |          | 1223(67.38) | 530(29.2)  | 62(3.42)   |          | 0.624 |
|     | rs1109959  | T           | C           |          | TT          | TC         | CC         |          |       |
| SCZ | 53,766,195 | 1884(84.33) | 350(15.67)  | 0.120806 | 798(71.44)  | 288(25.78) | 31(2.78)   | 0.277038 | 0.417 |
| CTR |            | 3115(85.81) | 515(14.19)  |          | 1338(73.72) | 439(24.19) | 38(2.09)   |          | 0.777 |
|     | rs3821865  | T           | C           |          | TT          | TC         | CC         |          |       |
| SCZ | 53,768,268 | 1446(64.73) | 788(35.27)  | 0.569776 | 475(42.52)  | 496(44.4)  | 146(13.07) | 0.615609 | 0.357 |
| CTR |            | 2323(63.99) | 1307(36.01) |          | 742(40.88)  | 839(46.23) | 234(12.89) |          | 0.895 |
|     | rs3774581  | A           | G           |          | AA          | AG         | GG         |          |       |
| SCZ | 53,768,721 | 1331(59.58) | 903(40.42)  | 0.184596 | 394(35.27)  | 543(48.61) | 180(16.11) | 0.408563 | 0.756 |
| CTR |            | 2226(61.32) | 1404(38.68) |          | 681(37.52)  | 864(47.6)  | 270(14.88) |          | 0.881 |
|     | rs7617553  | G           | A           |          | GG          | GA         | AA         |          |       |
| SCZ | 53,779,205 | 1453(65.04) | 781(34.96)  | 0.411795 | 474(42.44)  | 505(45.21) | 138(12.35) | 0.707901 | 0.845 |
| CTR |            | 2399(66.09) | 1231(33.91) |          | 793(43.69)  | 813(44.79) | 209(11.52) |          | 0.977 |
|     | rs11707420 | G           | A           |          | GG          | GA         | AA         |          |       |
| SCZ | 53,781,838 | 1653(73.99) | 581(26.01)  | 0.248435 | 613(54.88)  | 427(38.23) | 77(6.89)   | 0.505318 | 0.822 |
| CTR |            | 2636(72.62) | 994(27.38)  |          | 957(52.73)  | 722(39.78) | 136(7.49)  |          | 0.991 |
|     | rs3774589  | G           | T           |          | GG          | GT         | TT         |          |       |
| SCZ | 53,783,331 | 1485(66.47) | 749(33.53)  | 0.503362 | 489(43.78)  | 507(45.39) | 121(10.83) | 0.757562 | 0.54  |
| CTR |            | 2382(65.62) | 1248(34.38) |          | 779(42.92)  | 824(45.4)  | 212(11.68) |          | 0.792 |
|     | rs3774604  | C           | T           |          | CC          | CT         | TT         |          |       |
| SCZ | 53,790,109 | 1788(80.04) | 446(19.96)  | 0.357732 | 712(63.74)  | 364(32.59) | 41(3.67)   | 0.588168 | 0.51  |

|     |            |             |             |          |             |            |            |          |       |
|-----|------------|-------------|-------------|----------|-------------|------------|------------|----------|-------|
| CTR |            | 2869(79.04) | 761(20.96)  |          | 1133(62.42) | 603(33.22) | 79(4.35)   |          | 0.913 |
|     | rs3774609  | T           | G           |          | TT          | TG         | GG         |          |       |
| SCZ | 53,798,876 | 1386(62.04) | 848(37.96)  | 0.299791 | 427(38.23)  | 532(47.63) | 158(14.15) | 0.509647 | 0.708 |
| CTR |            | 2301(63.39) | 1329(36.61) |          | 733(40.39)  | 835(46.01) | 247(13.61) |          | 0.707 |
|     | rs3796349  | A           | G           |          | AA          | AG         | GG         |          |       |
| SCZ | 53,799,482 | 1723(77.13) | 511(22.87)  | 0.285156 | 667(59.71)  | 389(34.83) | 61(5.46)   | 0.528885 | 0.664 |
| CTR |            | 2843(78.32) | 787(21.68)  |          | 1113(61.32) | 617(33.99) | 85(4.68)   |          | 0.966 |
|     | rs2359133  | C           | G           |          | CC          | CG         | GG         |          |       |
| SCZ | 53,802,715 | 1654(74.04) | 580(25.96)  | 0.347325 | 609(54.52)  | 436(39.03) | 72(6.45)   | 0.575839 | 0.608 |
| CTR |            | 2647(72.92) | 983(27.08)  |          | 966(53.22)  | 715(39.39) | 134(7.38)  |          | 0.915 |
|     | rs3774611  | G           | A           |          | GG          | GA         | AA         |          |       |
| SCZ | 53,806,638 | 1183(52.95) | 1051(47.05) | 0.124304 | 308(27.57)  | 567(50.76) | 242(21.67) | 0.249082 | 0.53  |
| CTR |            | 1997(55.01) | 1633(44.99) |          | 552(30.41)  | 893(49.2)  | 370(20.39) |          | 0.799 |
|     | rs10154841 | C           | T           |          | CC          | CT         | TT         |          |       |
| SCZ | 53,811,268 | 1826(81.74) | 408(18.26)  | 0.152133 | 743(66.52)  | 340(30.44) | 34(3.04)   | 0.317411 | 0.514 |
| CTR |            | 3020(83.2)  | 610(16.8)   |          | 1256(69.2)  | 508(27.99) | 51(2.81)   |          | 0.966 |
|     | rs10490844 | A           | G           |          | AA          | AG         | GG         |          |       |
| SCZ | 53,812,050 | 1878(84.06) | 356(15.94)  | 0.122258 | 787(70.46)  | 304(27.22) | 26(2.33)   | 0.247641 | 0.597 |
| CTR |            | 2995(82.51) | 635(17.49)  |          | 1238(68.21) | 519(28.6)  | 58(3.2)    |          | 0.689 |
|     | rs877483   | C           | T           |          | CC          | CT         | TT         |          |       |
| SCZ | 53,812,714 | 1962(87.82) | 272(12.18)  | 0.178846 | 865(77.44)  | 232(20.77) | 20(1.79)   | 0.20131  | 0.336 |
| CTR |            | 3144(86.61) | 486(13.39)  |          | 1358(74.82) | 428(23.58) | 29(1.6)    |          | 0.474 |
|     | rs877484   | G           | A           |          | GG          | GA         | AA         |          |       |
| SCZ | 53,812,897 | 1734(77.62) | 500(22.38)  | 0.217942 | 675(60.43)  | 384(34.38) | 58(5.19)   | 0.467788 | 0.724 |
| CTR |            | 2867(78.98) | 763(21.02)  |          | 1134(62.48) | 599(33)    | 82(4.52)   |          | 0.798 |

SCZ: schizophrenia; CTR: control

1. p-values of the normal chi-square statistics from Monte Carlo stimulation using CLUMP (T2).



TableS2 Gender specific allele and genotype association analysis in the testing and validation datasets

| Markers   |                  | The testing dataset |                      |                    |            |            |                      |              |                  | The validation dataset |                      |                    |             |             |                      |              |       |
|-----------|------------------|---------------------|----------------------|--------------------|------------|------------|----------------------|--------------|------------------|------------------------|----------------------|--------------------|-------------|-------------|----------------------|--------------|-------|
| SNP ID    | Allele Freq. (%) |                     | p-value <sup>1</sup> | Genotype Freq. (%) |            |            | p-value <sup>1</sup> | H-WE p-value | Allele Freq. (%) |                        | p-value <sup>1</sup> | Genotype Freq. (%) |             |             | p-value <sup>1</sup> | H-WE p-value |       |
| rs709323  | T                | G                   |                      | TT                 | GT         | GG         |                      |              | T                | G                      |                      | TT                 | GT          | GG          |                      |              |       |
| F         | SCZ              | 865(74.44)          | 297(25.56)           | 0.338366           | 325(55.94) | 215(37.01) | 41(7.06)             | 0.417513     | 0.507            | 1014(76.13)            | 318(23.87)           | 0.118812           | 386(57.96)  | 242(36.34)  | 38(5.71)             | 0.435644     | 0.993 |
|           | CTR              | 1327(76)            | 419(24)              |                    | 501(57.39) | 325(37.23) | 47(5.38)             |              | 0.543            | 3139(77.89)            | 891(22.11)           |                    | 1221(60.6)  | 697(34.59)  | 97(4.81)             |              | 0.847 |
| M         | SCZ              | 791(73.79)          | 281(26.21)           | 0.115449           | 295(55.04) | 201(37.5)  | 40(7.46)             | 0.177906     | 0.479            | 1208(79.06)            | 320(20.94)           | 0.643564           | 482(63.09)  | 244(31.94)  | 38(4.97)             | 0.673267     | 0.326 |
|           | CTR              | 1439(76.38)         | 445(23.62)           |                    | 546(57.96) | 347(36.84) | 49(5.2)              |              | 0.521            | 3630(79.61)            | 930(20.39)           |                    | 1446(63.42) | 738(32.37)  | 96(4.21)             |              | 0.881 |
| rs3774458 | G                | A                   |                      | GG                 | GA         | AA         |                      |              | G                | A                      |                      | GG                 | GA          | AA          |                      |              |       |
| F         | SCZ              | 921(79.26)          | 241(20.74)           | 0.193250           | 368(63.34) | 185(31.84) | 28(4.82)             | 0.260661     | 0.448            | 1099(82.51)            | 233(17.49)           | 0.128713           | 455(68.32)  | 189(28.38)  | 22(3.3)              | 0.386139     | 0.663 |
|           | CTR              | 1418(81.21)         | 328(18.79)           |                    | 573(65.64) | 272(31.16) | 28(3.21)             |              | 0.533            | 3390(84.12)            | 640(15.88)           |                    | 1425(70.72) | 540(26.8)   | 50(2.48)             |              | 0.891 |
| M         | SCZ              | 863(80.5)           | 209(19.5)            | 0.262687           | 351(65.49) | 161(30.04) | 24(4.48)             | 0.304203     | 0.318            | 1270(83.12)            | 258(16.88)           | 0.683168           | 532(69.63)  | 206(26.96)  | 26(3.4)              | 0.623762     | 0.277 |
|           | CTR              | 1548(82.17)         | 336(17.83)           |                    | 634(67.3)  | 280(29.72) | 28(2.97)             |              | 0.663            | 3808(83.51)            | 752(16.49)           |                    | 1590(69.74) | 628(27.54)  | 62(2.72)             |              | 0.999 |
| rs1460118 | A                | G                   |                      | AA                 | AG         | GG         |                      |              | A                | G                      |                      | AA                 | AG          | GG          |                      |              |       |
| F         | SCZ              | 836(71.94)          | 326(28.06)           | 0.184264           | 306(52.67) | 224(38.55) | 51(8.78)             | 0.410301     | 0.279            | 964(72.37)             | 368(27.63)           | 0.316832           | 354(53.15)  | 256(38.44)  | 56(8.41)             | 0.396040     | 0.317 |
|           | CTR              | 1295(74.17)         | 451(25.83)           |                    | 485(55.56) | 325(37.23) | 63(7.22)             |              | 0.401            | 2970(73.7)             | 1060(26.3)           |                    | 1094(54.29) | 782(38.81)  | 139(6.9)             |              | 0.963 |
| M         | SCZ              | 759(70.8)           | 313(29.2)            | 0.171790           | 267(49.81) | 225(41.98) | 44(8.21)             | 0.387195     | 0.723            | 1098(71.86)            | 430(28.14)           | 0.722772           | 394(51.57)  | 310(40.58)  | 60(7.85)             | 0.940594     | 0.928 |
|           | CTR              | 1378(73.14)         | 506(26.86)           |                    | 501(53.18) | 376(39.92) | 65(6.9)              |              | 0.625            | 3300(72.37)            | 1260(27.63)          |                    | 1195(52.41) | 910(39.91)  | 175(7.68)            |              | 0.923 |
| rs3774530 | T                | C                   |                      | TT                 | TC         | CC         |                      |              | T                | C                      |                      | TT                 | TC          | CC          |                      |              |       |
| F         | SCZ              | 795(68.42)          | 367(31.58)           | 0.286259           | 269(46.3)  | 257(44.23) | 55(9.47)             | 0.492239     | 0.570            | 821(61.64)             | 511(38.36)           | 0.168317           | 248(37.24)  | 325(48.8)   | 93(13.96)            | 0.326733     | 0.411 |
|           | CTR              | 1227(70.27)         | 519(29.73)           |                    | 432(49.48) | 363(41.58) | 78(8.93)             |              | 0.889            | 2559(63.5)             | 1471(36.5)           |                    | 812(40.3)   | 935(46.4)   | 268(13.3)            |              | 0.964 |
| M         | SCZ              | 746(69.59)          | 326(30.41)           | 0.178907           | 257(47.95) | 232(43.28) | 47(8.77)             | 0.393473     | 0.600            | 976(63.87)             | 552(36.13)           | 0.306931           | 313(40.97)  | 350(45.81)  | 101(13.22)           | 0.712871     | 0.839 |
|           | CTR              | 1355(71.92)         | 529(28.08)           |                    | 485(51.49) | 385(40.87) | 72(7.64)             |              | 0.714            | 2972(65.18)            | 1588(34.82)          |                    | 970(42.54)  | 1032(45.26) | 278(12.19)           |              | 0.890 |
| rs3774601 | G                | A                   |                      | GG                 | GA         | AA         |                      |              | G                | A                      |                      | GG                 | GA          | AA          |                      |              |       |
| F         | SCZ              | 889(76.51)          | 273(23.49)           | 0.197225           | 337(58)    | 215(37.01) | 29(4.99)             | 0.305520     | 0.479            | 1071(80.41)            | 261(19.59)           | 0.118812           | 429(64.41)  | 213(31.98)  | 24(3.6)              | 0.475248     | 0.699 |
|           | CTR              | 1299(74.4)          | 447(25.6)            |                    | 486(55.67) | 327(37.46) | 60(6.87)             |              | 0.621            | 3175(78.78)            | 855(21.22)           |                    | 1251(62.08) | 673(33.4)   | 91(4.52)             |              | 0.968 |
| M         | SCZ              | 834(77.8)           | 238(22.2)            | 0.144664           | 319(59.51) | 196(36.57) | 21(3.92)             | 0.148778     | 0.175            | 1252(81.94)            | 276(18.06)           | 0.297030           | 508(66.49)  | 236(30.89)  | 20(2.62)             | 0.336634     | 0.228 |
|           | CTR              | 1421(75.42)         | 463(24.58)           |                    | 538(57.11) | 345(36.62) | 59(6.26)             |              | 0.711            | 3680(80.7)             | 880(19.3)            |                    | 1485(65.13) | 710(31.14)  | 85(3.73)             |              | 0.991 |
| rs3774605 | C                | T                   |                      | CC                 | CT         | TT         |                      |              | C                | T                      |                      | CC                 | CT          | TT          |                      |              |       |
| F         | SCZ              | 1013(87.18)         | 149(12.82)           | 0.250920           | 443(76.25) | 127(21.86) | 11(1.89)             | 0.522391     | 0.591            | 1214(91.14)            | 118(8.86)            | 0.207921           | 553(83.03)  | 108(16.22)  | 5(0.75)              | 0.356436     | 0.913 |
|           | CTR              | 1496(85.68)         | 250(14.32)           |                    | 643(73.65) | 210(24.05) | 20(2.29)             |              | 0.562            | 3627(90)               | 403(10)              |                    | 1632(80.99) | 363(18.01)  | 20(0.99)             |              | 0.970 |
| M         | SCZ              | 919(85.73)          | 153(14.27)           | 0.245832           | 390(72.76) | 139(25.93) | 7(1.31)              | 0.183638     | 0.167            | 1377(90.12)            | 151(9.88)            | 0.415842           | 624(81.68)  | 129(16.88)  | 11(1.44)             | 0.267327     | 0.151 |
|           | CTR              | 1585(84.13)         | 299(15.87)           |                    | 669(71.02) | 247(26.22) | 26(2.76)             |              | 0.579            | 4078(89.43)            | 482(10.57)           |                    | 1821(79.87) | 436(19.12)  | 23(1.01)             |              | 0.584 |

SCZ: schizophrenia; CTR: control

1. p-values of the normal chi-square statistics from Monte Carlo stimulation using CLUMP (T2).

Table S3. Summary of the association test for imputed and typed SNPs using frequentist method.

| typed     | rs ID      | chromosome | position | alleleA | alleleB | MAF      | p-value   |
|-----------|------------|------------|----------|---------|---------|----------|-----------|
| imputed   | rs17053026 | 3          | 53393838 | C       | T       | 0.021803 | 0.965601  |
| imputed   | rs7630080  | 3          | 53495180 | A       | G       | 0.173381 | 0.145435  |
| imputed   | rs312480   | 3          | 53504180 | C       | T       | 0.150914 | 0.0544111 |
| imputed   | rs312487   | 3          | 53520662 | C       | T       | 0.428969 | 0.0260372 |
| imputed   | rs979220   | 3          | 53531263 | C       | T       | 0.277493 | 0.630679  |
| imputed   | rs3774430  | 3          | 53541490 | A       | G       | 0.144803 | 0.772245  |
| imputed   | rs9821489  | 3          | 53550768 | A       | G       | 0.18641  | 0.668399  |
| imputed   | rs12715461 | 3          | 53553923 | A       | G       | 0.364162 | 0.0766316 |
| imputed   | rs6445584  | 3          | 53562884 | A       | G       | 0.052615 | 0.25819   |
| imputed   | rs2359453  | 3          | 53567904 | A       | G       | 0.366846 | 0.0593187 |
| imputed   | rs17053186 | 3          | 53575177 | C       | T       | 0.231268 | 0.538227  |
| imputed   | rs17053195 | 3          | 53579995 | A       | G       | 0.038559 | 0.744416  |
| imputed   | rs11707155 | 3          | 53583346 | A       | G       | 0.017884 | 0.0130713 |
| imputed   | rs709317   | 3          | 53584650 | A       | G       | 0.170271 | 0.310384  |
| imputed   | rs709318   | 3          | 53584861 | C       | T       | 0.037522 | 0.522151  |
| imputed   | rs17053206 | 3          | 53584940 | C       | T       | 0.037584 | 0.729103  |
| genotyped | rs709323   | 3          | 53589524 | A       | C       | 0.21476  | 0.212286  |
| imputed   | rs807198   | 3          | 53590498 | A       | T       | 0.389382 | 0.201553  |
| imputed   | rs807197   | 3          | 53590738 | C       | T       | 0.183199 | 0.166577  |
| imputed   | rs807194   | 3          | 53591110 | A       | C       | 0.285451 | 0.147553  |
| imputed   | rs807193   | 3          | 53591378 | A       | G       | 0.255971 | 0.115306  |
| imputed   | rs807192   | 3          | 53591641 | C       | G       | 0.034697 | 0.469035  |
| genotyped | rs3774458  | 3          | 53592908 | A       | G       | 0.164454 | 0.230389  |
| imputed   | rs3774463  | 3          | 53598142 | C       | T       | 0.095695 | 0.472525  |
| imputed   | rs6445588  | 3          | 53605719 | C       | T       | 0.339507 | 0.527596  |
| imputed   | rs936450   | 3          | 53609466 | A       | G       | 0.496221 | 0.162494  |
| imputed   | rs9866078  | 3          | 53610482 | A       | G       | 0.462212 | 0.212784  |
| imputed   | rs9810888  | 3          | 53610635 | G       | T       | 0.457997 | 0.357922  |
| imputed   | rs7610071  | 3          | 53612735 | C       | T       | 0.333987 | 0.253543  |
| imputed   | rs17309406 | 3          | 53613751 | G       | T       | 0.064286 | 0.103387  |
| imputed   | rs3774473  | 3          | 53613891 | A       | G       | 0.161939 | 0.624262  |
| imputed   | rs11721212 | 3          | 53614979 | C       | T       | 0.042744 | 0.0380448 |
| imputed   | rs11918955 | 3          | 53616124 | A       | G       | 0.15867  | 0.799889  |
| imputed   | rs17053265 | 3          | 53621579 | A       | G       | 0.056947 | 0.535329  |
| imputed   | rs1460115  | 3          | 53622852 | C       | T       | 0.216633 | 0.349847  |
| imputed   | rs6794085  | 3          | 53624648 | A       | G       | 0.182652 | 0.122593  |
| imputed   | rs13063116 | 3          | 53624717 | A       | G       | 0.1259   | 0.531759  |
| imputed   | rs3796345  | 3          | 53628192 | C       | T       | 0.308859 | 0.069198  |
| imputed   | rs3774480  | 3          | 53629933 | C       | T       | 0.24098  | 0.333563  |
| imputed   | rs9850569  | 3          | 53631844 | A       | G       | 0.444539 | 0.106372  |
| imputed   | rs17053279 | 3          | 53634757 | A       | G       | 0.049128 | 0.495075  |
| imputed   | rs12493744 | 3          | 53635070 | C       | T       | 0.379856 | 0.999223  |

|           |            |   |          |   |   |          |             |
|-----------|------------|---|----------|---|---|----------|-------------|
| imputed   | rs3774487  | 3 | 53637234 | A | G | 0.16333  | 0.478643    |
| imputed   | rs3821854  | 3 | 53638332 | C | T | 0.460129 | 0.19373     |
| imputed   | rs3774490  | 3 | 53638688 | C | T | 0.130673 | 0.312897    |
| imputed   | rs3774491  | 3 | 53638875 | C | G | 0.30284  | 0.602494    |
| imputed   | rs6802110  | 3 | 53642272 | A | G | 0.06092  | 0.0191367   |
| imputed   | rs898415   | 3 | 53642679 | A | G | 0.233256 | 0.231991    |
| imputed   | rs1380606  | 3 | 53643172 | C | T | 0.232981 | 0.228397    |
| imputed   | rs11707976 | 3 | 53643748 | A | G | 0.091172 | 0.12223     |
| imputed   | rs11709171 | 3 | 53644944 | A | C | 0.032384 | 0.0133293   |
| imputed   | rs6786135  | 3 | 53645005 | C | T | 0.30216  | 0.572377    |
| imputed   | rs2077167  | 3 | 53646459 | C | T | 0.442368 | 0.137004    |
| imputed   | rs6763245  | 3 | 53650755 | A | G | 0.369521 | 0.0305456   |
| imputed   | rs6803827  | 3 | 53651373 | A | G | 0.491905 | 0.107498    |
| imputed   | rs3774503  | 3 | 53652225 | A | G | 0.127859 | 0.541786    |
| imputed   | rs1037827  | 3 | 53658352 | A | G | 0.442722 | 0.47058     |
| imputed   | rs2276836  | 3 | 53660079 | C | T | 0.379868 | 0.024254    |
| imputed   | rs11712998 | 3 | 53663998 | A | G | 0.088699 | 0.113746    |
| imputed   | rs3774519  | 3 | 53670282 | G | T | 0.072519 | 0.0197056   |
| imputed   | rs9881913  | 3 | 53671328 | A | G | 0.027275 | 0.648157    |
| imputed   | rs2250736  | 3 | 53675590 | C | T | 0.283242 | 0.377957    |
| imputed   | rs3821856  | 3 | 53675744 | A | G | 0.071161 | 0.184858    |
| imputed   | rs3774523  | 3 | 53675800 | C | T | 0.052977 | 0.436216    |
| imputed   | rs3774527  | 3 | 53680043 | C | T | 0.018084 | 0.852718    |
| imputed   | rs11130376 | 3 | 53680390 | C | T | 0.025625 | 0.0597129   |
| imputed   | rs2633707  | 3 | 53684122 | C | G | 0.288959 | 0.116806    |
| genotyped | rs1460118  | 3 | 53684891 | C | T | 0.272314 | 0.353417    |
| imputed   | rs1380609  | 3 | 53689216 | C | T | 0.097898 | 0.204061    |
| imputed   | rs12492502 | 3 | 53690114 | A | G | 0.320555 | 0.0739116   |
| imputed   | rs2680672  | 3 | 53691013 | C | T | 0.44657  | 0.185455    |
| imputed   | rs898411   | 3 | 53691952 | C | T | 0.286279 | 0.330672    |
| imputed   | rs898422   | 3 | 53692322 | A | G | 0.190529 | 0.340744    |
| imputed   | rs2612018  | 3 | 53694125 | C | T | 0.142946 | 0.47732     |
| imputed   | rs11130377 | 3 | 53697914 | C | T | 0.276576 | 0.821881    |
| imputed   | rs1380608  | 3 | 53699410 | A | G | 0.10837  | 0.999516    |
| imputed   | rs898417   | 3 | 53704431 | C | T | 0.05879  | 0.365498    |
| imputed   | rs9841978  | 3 | 53705775 | A | G | 0.28915  | 0.618174    |
| imputed   | rs7340705  | 3 | 53709483 | C | T | 0.404019 | 0.958748    |
| imputed   | rs6445597  | 3 | 53709571 | A | G | 0.293921 | 0.496198    |
| imputed   | rs9830632  | 3 | 53710806 | A | G | 0.269586 | 0.549856    |
| imputed   | rs17053363 | 3 | 53711597 | A | T | 0.075801 | 0.142328    |
| imputed   | rs3774529  | 3 | 53712201 | G | T | 0.076296 | 0.000974805 |
| genotyped | rs3774530  | 3 | 53712410 | C | T | 0.36     | 0.132757    |
| imputed   | rs3774531  | 3 | 53712615 | C | T | 0.463788 | 0.0534673   |
| imputed   | rs3774533  | 3 | 53713360 | A | G | 0.394867 | 0.0329672   |
| imputed   | rs2633731  | 3 | 53713464 | C | T | 0.25548  | 0.100647    |

|         |            |   |          |   |   |          |            |
|---------|------------|---|----------|---|---|----------|------------|
| imputed | rs3821857  | 3 | 53713500 | C | T | 0.092763 | 0.59609    |
| imputed | rs1380605  | 3 | 53713814 | C | T | 0.412203 | 0.0299649  |
| imputed | rs2633730  | 3 | 53715739 | C | T | 0.489768 | 0.0017902  |
| imputed | rs2633728  | 3 | 53715979 | C | G | 0.186695 | 0.126448   |
| imputed | rs3774541  | 3 | 53716172 | A | G | 0.32014  | 0.00714984 |
| imputed | rs2680661  | 3 | 53717188 | G | T | 0.396977 | 0.0117334  |
| imputed | rs2612015  | 3 | 53717371 | G | T | 0.191034 | 0.570121   |
| imputed | rs6445598  | 3 | 53717776 | A | T | 0.136991 | 0.0956017  |
| imputed | rs2633727  | 3 | 53721129 | A | G | 0.041382 | 0.109192   |
| imputed | rs10510765 | 3 | 53721246 | C | G | 0.062964 | 0.0291484  |
| imputed | rs13076366 | 3 | 53722414 | A | C | 0.112568 | 0.0701254  |
| imputed | rs11708227 | 3 | 53723073 | C | T | 0.113247 | 0.0712147  |
| imputed | rs11709505 | 3 | 53724538 | C | T | 0.113298 | 0.0729244  |
| imputed | rs2633725  | 3 | 53726782 | C | T | 0.051185 | 0.120158   |
| imputed | rs2070617  | 3 | 53733089 | A | G | 0.339687 | 0.533793   |
| imputed | rs7638857  | 3 | 53733363 | A | C | 0.449064 | 0.427743   |
| imputed | rs7649275  | 3 | 53733743 | A | G | 0.051643 | 0.170536   |
| imputed | rs17053417 | 3 | 53734429 | A | G | 0.140852 | 0.693104   |
| imputed | rs11719179 | 3 | 53734761 | A | G | 0.069926 | 0.0757988  |
| imputed | rs1020819  | 3 | 53737753 | A | C | 0.477101 | 0.695866   |
| imputed | rs2612033  | 3 | 53741066 | C | T | 0.051629 | 0.170861   |
| imputed | rs2029331  | 3 | 53742729 | C | G | 0.172573 | 0.641362   |
| imputed | rs17030975 | 3 | 53743245 | C | T | 0.412553 | 0.546145   |
| imputed | rs1045958  | 3 | 53744519 | C | T | 0.215696 | 0.0771334  |
| imputed | rs898423   | 3 | 53744805 | A | G | 0.231662 | 0.356364   |
| imputed | rs6800641  | 3 | 53745628 | A | G | 0.153385 | 0.823146   |
| imputed | rs2612028  | 3 | 53750487 | C | T | 0.123844 | 0.0452602  |
| imputed | rs2612027  | 3 | 53751718 | A | G | 0.483107 | 0.00575574 |
| imputed | rs2612026  | 3 | 53752035 | C | T | 0.161979 | 0.117266   |
| imputed | rs2680648  | 3 | 53752216 | C | T | 0.202035 | 0.0257444  |
| imputed | rs2612025  | 3 | 53753354 | C | T | 0.162663 | 0.133273   |
| imputed | rs2253795  | 3 | 53753915 | G | T | 0.124942 | 0.0474546  |
| imputed | rs3821860  | 3 | 53754865 | A | G | 0.194736 | 0.793547   |
| imputed | rs17053459 | 3 | 53756034 | A | G | 0.062464 | 0.0248007  |
| imputed | rs1809282  | 3 | 53756997 | A | G | 0.174244 | 0.114866   |
| imputed | rs719260   | 3 | 53764212 | C | T | 0.202151 | 0.0293601  |
| imputed | rs17053476 | 3 | 53764611 | C | T | 0.054917 | 0.830119   |
| imputed | rs7373253  | 3 | 53764634 | C | T | 0.047577 | 0.166375   |
| imputed | rs3774563  | 3 | 53765316 | A | G | 0.324104 | 0.38218    |
| imputed | rs4687738  | 3 | 53765449 | A | G | 0.031756 | 0.681566   |
| imputed | rs1401497  | 3 | 53766496 | A | G | 0.374156 | 0.37483    |
| imputed | rs755886   | 3 | 53766988 | A | T | 0.076469 | 0.325609   |
| imputed | rs12487452 | 3 | 53767451 | C | G | 0.428995 | 0.123964   |
| imputed | rs3796347  | 3 | 53767930 | A | G | 0.38744  | 0.709586   |
| imputed | rs3774573  | 3 | 53775000 | C | T | 0.226126 | 0.0640128  |

|           |            |   |          |   |   |          |             |
|-----------|------------|---|----------|---|---|----------|-------------|
| imputed   | rs1109959  | 3 | 53775262 | C | T | 0.081633 | 0.084326    |
| imputed   | rs3774577  | 3 | 53777303 | C | T | 0.214881 | 0.847773    |
| imputed   | rs3821865  | 3 | 53777335 | C | T | 0.483138 | 0.038997    |
| imputed   | rs3774581  | 3 | 53777788 | A | G | 0.333624 | 0.0241198   |
| imputed   | rs3774586  | 3 | 53786346 | A | G | 0.468061 | 0.0526836   |
| imputed   | rs7617553  | 3 | 53788272 | A | G | 0.488338 | 0.00935734  |
| imputed   | rs1829423  | 3 | 53789237 | A | G | 0.481822 | 0.0158282   |
| imputed   | rs11707420 | 3 | 53790905 | A | G | 0.457621 | 0.0391082   |
| imputed   | rs3774589  | 3 | 53792398 | G | T | 0.471245 | 0.0331647   |
| imputed   | rs3774598  | 3 | 53797359 | A | G | 0.060806 | 0.579825    |
| genotyped | rs3774601  | 3 | 53797933 | A | G | 0.198428 | 0.0976903   |
| imputed   | rs3774602  | 3 | 53798138 | C | T | 0.451118 | 0.00490801  |
| imputed   | rs3774604  | 3 | 53799176 | C | T | 0.173542 | 0.147659    |
| genotyped | rs3774605  | 3 | 53805807 | A | G | 0.100786 | 0.167836    |
| imputed   | rs3774608  | 3 | 53807752 | A | G | 0.489967 | 0.00588698  |
| imputed   | rs3774609  | 3 | 53807943 | G | T | 0.48872  | 0.00771914  |
| imputed   | rs3796349  | 3 | 53808549 | A | G | 0.241296 | 0.00131746  |
| imputed   | rs2359133  | 3 | 53811782 | C | G | 0.224395 | 0.326069    |
| imputed   | rs6766988  | 3 | 53814510 | A | T | 0.186663 | 0.532592    |
| imputed   | rs3774611  | 3 | 53815705 | A | G | 0.424272 | 0.0149894   |
| imputed   | rs7620619  | 3 | 53816844 | G | T | 0.040256 | 0.52209     |
| imputed   | rs10154841 | 3 | 53820335 | C | T | 0.236889 | 0.23392     |
| imputed   | rs10490844 | 3 | 53821117 | A | G | 0.084389 | 0.20107     |
| imputed   | rs877483   | 3 | 53821781 | C | T | 0.255213 | 0.811308    |
| imputed   | rs877484   | 3 | 53821964 | A | G | 0.468123 | 0.155127    |
| imputed   | rs893363   | 3 | 53822102 | A | G | 0.244722 | 0.107912    |
| imputed   | rs4687587  | 3 | 53824550 | A | G | 0.045688 | 0.000857143 |
| imputed   | rs7625247  | 3 | 53829108 | G | T | 0.423125 | 0.323176    |
| imputed   | rs9836592  | 3 | 53830123 | C | T | 0.149111 | 0.0139736   |
| imputed   | rs7626693  | 3 | 53833581 | C | T | 0.469813 | 0.29628     |
| imputed   | rs13317328 | 3 | 53845880 | A | C | 0.294388 | 0.0122726   |
| imputed   | rs6445607  | 3 | 53852189 | G | T | 0.302292 | 0.539262    |
| imputed   | rs3774616  | 3 | 53852973 | C | T | 0.201335 | 0.0139659   |
| imputed   | rs1025690  | 3 | 53857703 | A | G | 0.11246  | 0.0442932   |
| imputed   | rs999514   | 3 | 53864889 | C | T | 0.245371 | 0.0065726   |
| imputed   | rs2232344  | 3 | 53866727 | A | G | 0.010864 | 0.870174    |
| imputed   | rs17053571 | 3 | 53876834 | C | T | 0.171024 | 0.0212077   |
| imputed   | rs2289204  | 3 | 53881374 | A | C | 0.179411 | 0.0214243   |
| imputed   | rs2276847  | 3 | 53900815 | C | T | 0.170387 | 0.0280084   |
| imputed   | rs7636856  | 3 | 53909211 | A | G | 0.21158  | 0.00484205  |
| imputed   | rs7624521  | 3 | 53923356 | G | T | 0.361294 | 0.00433826  |
| imputed   | rs11130386 | 3 | 53968526 | A | G | 0.17175  | 0.0482104   |

Table S4 General power analysis of testing dataset

| OR \ MAF | 0.05  | 0.10  | 0.20  | 0.30  | 0.40  | 0.50  |
|----------|-------|-------|-------|-------|-------|-------|
| 1.1      | 0.107 | 0.147 | 0.184 | 0.182 | 0.159 | 0.127 |
| 1.2      | 0.272 | 0.414 | 0.525 | 0.512 | 0.434 | 0.324 |
| 1.3      | 0.505 | 0.716 | 0.829 | 0.810 | 0.719 | 0.562 |
| 1.4      | 0.727 | 0.905 | 0.961 | 0.950 | 0.894 | 0.758 |
| 1.5      | 0.878 | 0.978 | 0.994 | 0.991 | 0.968 | 0.882 |

OR: odds ratio; MAF: minor allele frequency

Table S5 General power analysis of validation dataset

| OR \ MAF | 0.05  | 0.10  | 0.20  | 0.30  | 0.40  | 0.50  |
|----------|-------|-------|-------|-------|-------|-------|
| 1.1      | 0.158 | 0.233 | 0.301 | 0.296 | 0.252 | 0.193 |
| 1.2      | 0.461 | 0.668 | 0.789 | 0.773 | 0.682 | 0.530 |
| 1.3      | 0.783 | 0.938 | 0.979 | 0.972 | 0.932 | 0.817 |
| 1.4      | 0.948 | 0.995 | 0.999 | 0.999 | 0.992 | 0.949 |
| 1.5      | 0.993 | 0.999 | 0.999 | 0.999 | 0.999 | 0.989 |

OR: odds ratio; MAF: minor allele frequency
